# Supplementary material for: Systematic Analysis of the Relative Abundance of Polymers Occurring as Microplastics in Freshwaters and Estuaries
Source: PubMed Central journal article supplement (PMC7764371; doi:10.3390/ijerph17249304), 2020-12-12
Supplement: ijerph-17-09304-s001.pdf [file ijerph-17-09304-s001.pdf]

## Electronic Supplementary Information

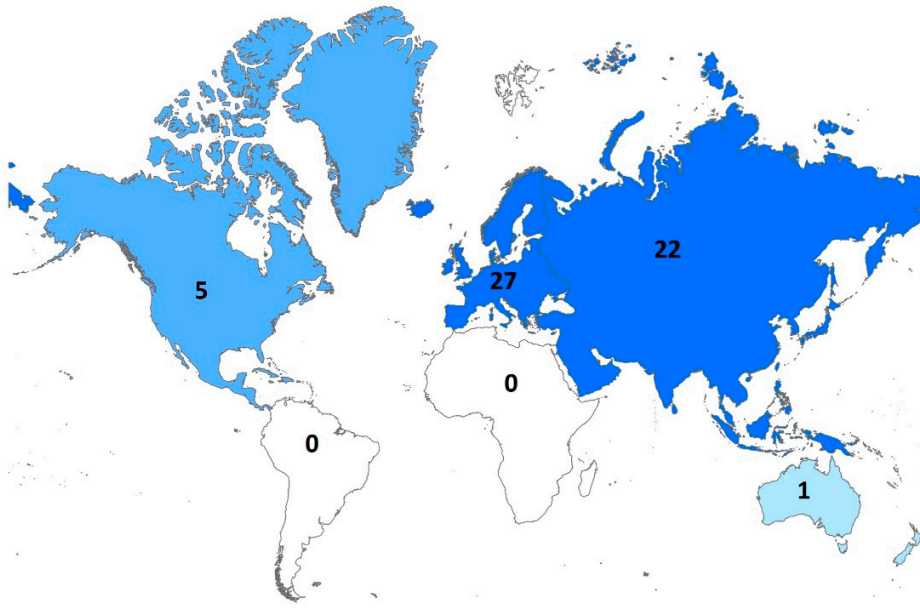

**Figure S1.** Map showing the geographical locations of the studies that were used for this review.

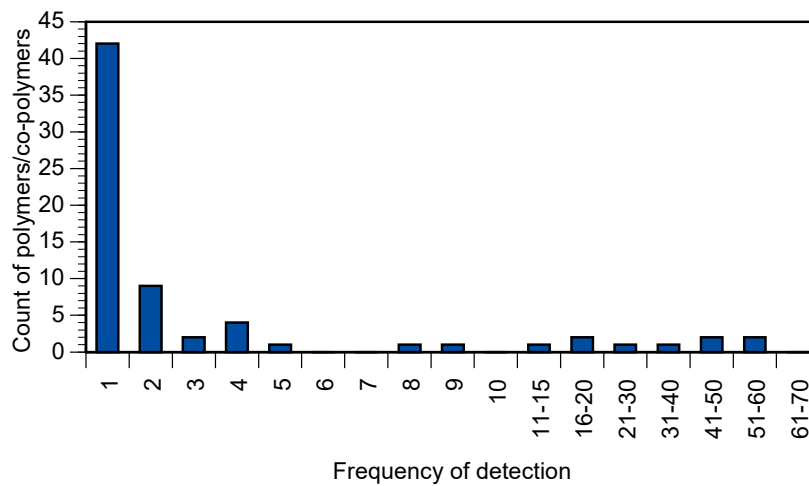

**Figure S2.** Frequency of detection of polymers/co-polymers by studies of microplastics in water, sediment and biota sampled in freshwaters and estuaries.

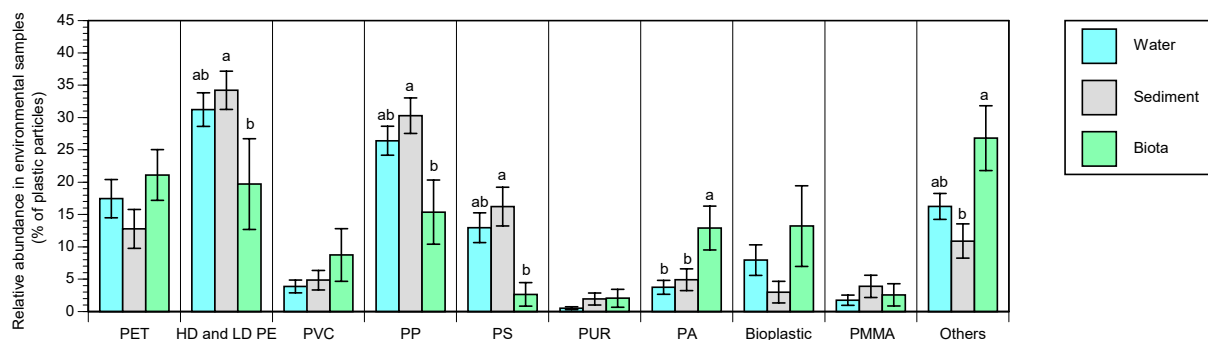

**Figure S3.** Mean relative abundance of polymers (% of particles  $\pm$  SE) including more frequent miscellaneous plastics, reported as microplastics in water (n = 39), sediment (n = 23) and biota (n = 10) sampled in freshwaters and estuaries. Influence of matrix (water, sediment or biota)  $p = 0.0444$  from MANVOVA. Significant differences within polymers were identified by Tukey's test, where means that are not significantly different (within polymers) share the same letter.

**Table S1.** List of references used as evidence sources.

- Atwood, E.C.; Falcieri, F.M.; Piehl, S.; Bochow, M.; Matthies, M.; Franke, J.; Carniel, S.; Sclavo, M.; Laforsch, C.; Siegert, F. Coastal accumulation of microplastic particles emitted from the Po River, Northern Italy: Comparing remote sensing and hydrodynamic modelling with in situ sample collections. *Mar. Pollut. Bull.* **2019**, *138*, 561–574.
- Ball, H., Cross, R., Grove, E., Horton, A., Johnson, A., Jurgens, M., Read, D., Svendsen, C. Sink To River – River To Tap. A Review of Potential Risks From Nanoparticles and Microplastics. Report, UK Water Industry Research Limited, 2019.
- Ballent, A.; Corcoran, P.L.; Madden, O.; Helm, P.A.; Longstaffe, F.J. Sources and sinks of microplastics in Canadian Lake Ontario nearshore, tributary and beach sediments. *Mar. Pollut. Bull.* **2016**, *110*, 383–395.
- Browne, M.A.; Crump, P.; Niven, S.J.; Teuten, E.; Tonkin, A.; Galloway, T.; Thompson, R. Accumulation of Microplastic on Shorelines Worldwide: Sources and Sinks. *Environ. Sci. Technol.* **2011**, *45*, 9175–9179.
- Browne, M.A.; Galloway, T.S.; Thompson, R.C. Spatial patterns of plastic debris along estuarine shorelines. *Environ. Sci. Technol.* **2010**, *44*, 3404–3409.
- Collard, F.; Gasperi, J.; Gilbert, B.; Eppe, G.; Azimi, S.; Rocher, V.; Tassin, B. Anthropogenic particles in the stomach contents and liver of the freshwater fish *Squalius cephalus*. *Sci. Total Environ.* **2018**, *643*, 1257–1264.
- Cheung, L.T.O.; Lui, C.Y.; Fok, L. Microplastic contamination of wild and captive flathead grey mullet (*Mugil cephalus*). *Int. J. Environ. Res. Public Health* **2018**, *15*, 597–608.
- de Lucia, G.A.; Vianello, A.; Camedda, A.; Vani, D.; Tomassetti, P.; Coppa, S.; Palazzo, L.; Amici, M.; Romanelli, G.; Zampetti, G.; et al. Sea Water Contamination in the Vicinity of the Italian Minor Islands Caused by Microplastic Pollution. *Water* **2018**, *10*, 1108–1121.
- Dean, B.Y.; Corcoran, P.L.; Helm, P.A. Factors influencing microplastic abundances in nearshore, tributary and beach sediments along the Ontario shoreline of Lake Erie. *J. Great Lakes Res.* **2018**, *44*, 1002–1009.
- Di, M.; Liu, X.; Wang, W.; Wang, J. Manuscript prepared for submission to environmental toxicology and pharmacology pollution in drinking water source areas: Microplastics in the Danjiangkou Reservoir, China. *Environ. Toxicol. Pharmacol.* **2019**, *65*, 82–89.
- Dris, R. First assessment of sources and fate of macro and micro plastics in urban hydrosystems : Case of Paris megacity PhD thesis, Université Paris-Est, France, 2017.
- Frère, L.; Paul-Pont, I.; Moreau, J.; Soudant, P.; Lambert, C.; Huvet, A.; Rinnert, E. A semi-automated Raman micro-spectroscopy method for morphological and chemical characterizations of microplastic litter. *Mar. Pollut. Bull.* **2016**, *113*, 461–468.

13. Frère, L.; Paul-Pont, I.; Rinnert, E.; Petton, S.; Jaffré, J.; Bihannic, I.; Soudant, P.; Lambert, C.; Huvet, A. Influence of environmental and anthropogenic factors on the composition, concentration and spatial distribution of microplastics: A case study of the Bay of Brest (Brittany, France). *Environ. Pollut.* **2017**, *225*, 211–222.
14. Garaba, S.P.; Dierssen, H.M. An airborne remote sensing case study of synthetic hydrocarbon detection using short wave infrared absorption features identified from marine-harvested macro- and microplastics. *Remote Sens. Environ.* **2018**, *205*, 224–235.
15. Gündoğdu, S.; Çevik, C.; Ayat, B.; Aydoğan, B.; Karaca, S. How microplastics quantities increase with flood events? An example from Mersin Bay NE Levantine coast of Turkey. *Environ. Pollut.* **2018**, *239*, 342–350.
16. Hendrickson, E.M. Microplastics in the surface water and sediments of western Lake Superior as determined via microscopy, Pyr-GC/MS, and FTIR. Master Thesis, University of Minnesota, USA, 2017.
17. Horton, A.A.; Svendsen, C.; Williams, R.J.; Spurgeon, D.J.; Lahive, E. Large microplastic particles in sediments of tributaries of the River Thames, UK – Abundance, sources and methods for effective quantification. *Mar. Pollut. Bull.* **2017**, *114*, 218–226.
18. Imhof, H.K.; Ivleva, N.P.; Schmid, J.; Niessner, R.; Laforsch, C. Contamination of beach sediments of a subalpine lake with microplastic particles. *Curr. Biol.* **2013**, *23*, R867–R868.
19. Jabeen, K.; Su, L.; Li, J.; Yang, D.; Tong, C.; Mu, J.; Shi, H. Microplastics and mesoplastics in fish from coastal and fresh waters of China. *Environ. Pollut.* **2017**, *221*, 141–149.
20. Jiang, Y.; Zhao, Y.; Wang, X.; Yang, F.; Chen, M.; Wang, J. Characterization of microplastics in the surface seawater of the South Yellow Sea as affected by season. *Sci. Total Environ.* **2020**, *724*, 138375.
21. Kataoka, T.; Nihei, Y.; Kudou, K.; Hinata, H. Assessment of the sources and inflow processes of microplastics in the river environments of Japan. *Environ. Pollut.* **2019**, *244*, 958–965.
22. Kazour, M.; Jemaa, S.; El Rakwe, M.; Duflos, G.; Hermabassiere, L.; Dehaut, A.; Le Bihanic, F.; Cachot, J.; Cornille, V.; Rabhi, K.; et al. Juvenile fish caging as a tool for assessing microplastics contamination in estuarine fish nursery grounds. *Environ. Sci. Pollut. Res.* **2020**, *27*, 3548–3559.
23. Lahens, L.; Strady, E.; Kieu-Le, T.C.; Dris, R.; Boukerma, K.; Rinnert, E.; Gasperi, J.; Tassin, B. Macroplastic and microplastic contamination assessment of a tropical river (Saigon River, Vietnam) transversed by a developing megacity. *Environ. Pollut.* **2018**, *236*, 661–671.
24. Li, R.; Zhang, L.; Xue, B.; Wang, Y. Abundance and characteristics of microplastics in the mangrove sediment of the semi-enclosed Maowei Sea of the south China sea: New implications for location, rhizosphere, and sediment compositions. *Environ. Pollut.* **2019**, *244*, 685–692.
25. Long, Z.; Pan, Z.; Wang, W.; Ren, J.; Yu, X.; Lin, L.; Lin, H.; Chen, H.; Jin, X. Microplastic abundance, characteristics, and removal in wastewater treatment plants in a coastal city of China. *Water Res.* **2019**, *155*, 255–265.
26. Luo, W.; Su, L.; Craig, N.J.; Du, F.; Wu, C.; Shi, H. Comparison of microplastic pollution in different water bodies from urban creeks to coastal waters. *Environ. Pollut.* **2019**, *246*, 174–182.
27. Lusher, A.L., Nina T. Buenaventura, David P. Eidsvoll, Jan-Erik Thrane, A.Ø. and M.J. Freshwater microplastics in Norway A first look at sediment, biota and historical plankton samples from Lake Mjøsa and Lake Femunden. Report, NIVA 7326-2018, 2018.
28. Majewsky, M.; Bitter, H.; Eiche, E.; Horn, H. Determination of microplastic polyethylene (PE) and polypropylene (PP) in environmental samples using thermal analysis (TGA-DSC). *Sci. Total Environ.* **2016**, *568*, 507–511.
29. Mani, T.; Blarer, P.; Storck, F.R.; Pittroff, M.; Wernicke, T.; Burkhardt-Holm, P. Repeated detection of polystyrene microbeads in the lower Rhine River. *Environ. Pollut.* **2019**, *245*, 634–641.
30. McGoran, A.R.; Cowie, P.R.; Clark, P.F.; McEvoy, J.P.; Morritt, D. Ingestion of plastic by fish: A comparison of Thames Estuary and Firth of Clyde populations. *Mar. Pollut. Bull.* **2018**, *137*, 12–23.
31. Peng, G.; Xu, P.; Zhu, B.; Bai, M.; Li, D. Microplastics in freshwater river sediments in Shanghai, China: A case study of risk assessment in mega-cities. *Environ. Pollut.* **2018**, *234*, 448–456.

32. Peters, C.A.; Hendrickson, E.; Minor, E.C.; Schreiner, K.; Halbur, J.; Bratton, S.P. Pyr-GC/MS analysis of microplastics extracted from the stomach content of benthivore fish from the Texas Gulf Coast. *Mar. Pollut. Bull.* **2018**, *137*, 91–95.
33. Pivokonsky, M.; Cermakova, L.; Novotna, K.; Peer, P.; Cajthaml, T.; Janda, V. Occurrence of microplastics in raw and treated drinking water. *Sci. Total Environ.* **2018**, *643*, 1644–1651.
34. Rodrigues, M.O.; Abrantes, N.; Gonçalves, F.J.M.; Nogueira, H.; Marques, J.C.; Gonçalves, A.M.M. Spatial and temporal distribution of microplastics in water and sediments of a freshwater system (Antuã River, Portugal). *Sci. Total Environ.* **2018**, *633*, 1549–1559.
35. Sadri, S.S. Investigation of microplastic debris in marine surface waters using different sampling methods. PhD Thesis, University of Plymouth, UK, 2015.
36. Santillo, D.; Brigden, K.; Pasteur, V.; Nicholls, F.; Morozzo, P.; Johnston, P. Plastic pollution in UK's rivers: a "snapshot" survey of macro-and microplastic contamination in surface waters of 13 river systems across England, Wales, Scotland and Northern Ireland. Technical Report, Greenpeace Research Laboratories, 2019.
37. Sighicelli, M.; Pietrelli, L.; Lecce, F.; Iannilli, V.; Falconieri, M.; Coscia, L.; Di Vito, S.; Nuglio, S.; Zampetti, G. Microplastic pollution in the surface waters of Italian Subalpine Lakes. *Environ. Pollut.* **2018**, *236*, 645–651.
38. Su, L.; Cai, H.; Kolandhasamy, P.; Wu, C.; Rochman, C.M.; Shi, H. Using the Asian clam as an indicator of microplastic pollution in freshwater ecosystems. *Environ. Pollut.* **2018**, *234*, 347–355.
39. Talvitie, J.; Mikola, A.; Setälä, O.; Heinonen, M.; Koistinen, A. How well is microlitter purified from wastewater? – A detailed study on the stepwise removal of microlitter in a tertiary level wastewater treatment plant. *Water Res.* **2017**, *109*.
40. Talvitie, J.; Mikola, A.; Koistinen, A.; Setälä, O. Solutions to microplastic pollution – Removal of microplastics from wastewater effluent with advanced wastewater treatment technologies. *Water Res.* **2017**, *123*, 401–407.
41. Tan, X.; Yu, X.; Cai, L.; Wang, J.; Peng, J. Microplastics and associated PAHs in surface water from the Feilaixia Reservoir in the Beijiang River, China. *Chemosphere* **2019**, *221*, 834–840.
42. van der Wal, M.; van der Meulen, M.; Tweehuijsen, G.; Peterlin, M.; Palatinus, A.; Kovač Viršek, M.; Coscia, L.; Kržan, A. SFRA0025: Identification and Assessment of Riverine Input of (Marine) Litter; Report, Eunomia Research & Consulting Ltd, 2015.
43. Veerasingam, S.; Mugilarasan, M.; Venkatachalapathy, R.; Vethamony, P. Influence of 2015 flood on the distribution and occurrence of microplastic pellets along the Chennai coast, India. *Mar. Pollut. Bull.* **2016**, *109*, 196–204.
44. Vianello, A.; Boldrin, A.; Guerriero, P.; Moschino, V.; Rella, R.; Sturaro, A.; Da Ros, L. Microplastic particles in sediments of Lagoon of Venice, Italy: First observations on occurrence, spatial patterns and identification. *Estuar. Coast. Shelf Sci.* **2013**, *130*, 54–61.
45. Wang, J.; Peng, J.; Tan, Z.; Gao, Y.; Zhan, Z.; Chen, Q.; Cai, L. Microplastics in the surface sediments from the Beijiang River littoral zone: Composition, abundance, surface textures and interaction with heavy metals. *Chemosphere* **2017**, *171*, 248–258.
46. Xiong, X.; Zhang, K.; Chen, X.; Shi, H.; Luo, Z.; Wu, C. Sources and distribution of microplastics in China's largest inland lake – Qinghai Lake. *Environ. Pollut.* **2018**, *235*, 899–906.
47. Xiong, X.; Wu, C.; Elser, J.J.; Mei, Z.; Hao, Y. Occurrence and fate of microplastic debris in middle and lower reaches of the Yangtze River – From inland to the sea. *Sci. Total Environ.* **2019**, *659*, 66–73.
48. Yan, M.; Nie, H.; Xu, K.; He, Y.; Hu, Y.; Huang, Y.; Wang, J. Microplastic abundance, distribution and composition in the Pearl River along Guangzhou city and Pearl River estuary, China. *Chemosphere* **2019**, *217*, 879–886.
49. Yang, L.; Li, K.; Cui, S.; Kang, Y.; An, L.; Lei, K. Removal of microplastics in municipal sewage from China's largest water reclamation plant. *Water Res.* **2019**, *155*, 175–181.
50. Zada, L.; Leslie, H.A.; Vethaak, A.D.; Tinnevelt, G.H.; Jansen, J.J.; de Boer, J.F.; Ariese, F. Fast microplastics identification with stimulated Raman scattering microscopy. *J. Raman Spectrosc.* **2018**, *49*, 1136–1144.

51. Zhang, K.; Xiong, X.; Hu, H.; Wu, C.; Bi, Y.; Wu, Y.; Zhou, B.; Lam, P.K.S.; Liu, J. Occurrence and Characteristics of Microplastic Pollution in Xiangxi Bay of Three Gorges Reservoir, China. *Environ. Sci. Technol.* **2017**, *51*, 3794–3801.
52. Zhang, K.; Su, J.; Xiong, X.; Wu, X.; Wu, C.; Liu, J. Microplastic pollution of lakeshore sediments from remote lakes in Tibet plateau, China. *Environ. Pollut.* **2016**, *219*, 450–455.
53. Zhang, K.; Gong, W.; Lv, J.; Xiong, X.; Wu, C. Accumulation of floating microplastics behind the Three Gorges Dam. *Environ. Pollut.* **2015**, *204*, 117–123.
54. Zhang, X.; Leng, Y.; Liu, X.; Huang, K.; Wang, J. Microplastics' Pollution and Risk Assessment in an Urban River: A Case Study in the Yongjiang River, Nanning City, South China. *Expo. Heal.* **2020**, *12*, 141–151.
55. Zobkov, M.B.; Esiukova, E.E.; Zyubin, A.Y.; Samusev, I.G. Microplastic content variation in water column: The observations employing a novel sampling tool in stratified Baltic Sea. *Mar. Pollut. Bull.* **2019**, *138*, 193–205.
